# Supplementary material
Source: Springer Nature journal article supplement (https://www.springermedizin.de/resource/supplementary/13034_2008_63_MOESM5_ESM.pdf/9652316)
Supplement: MOESM5 [file 9652316]

# ECBI F (n=20), then ECBI I (n=0), then CBCL (n=4)

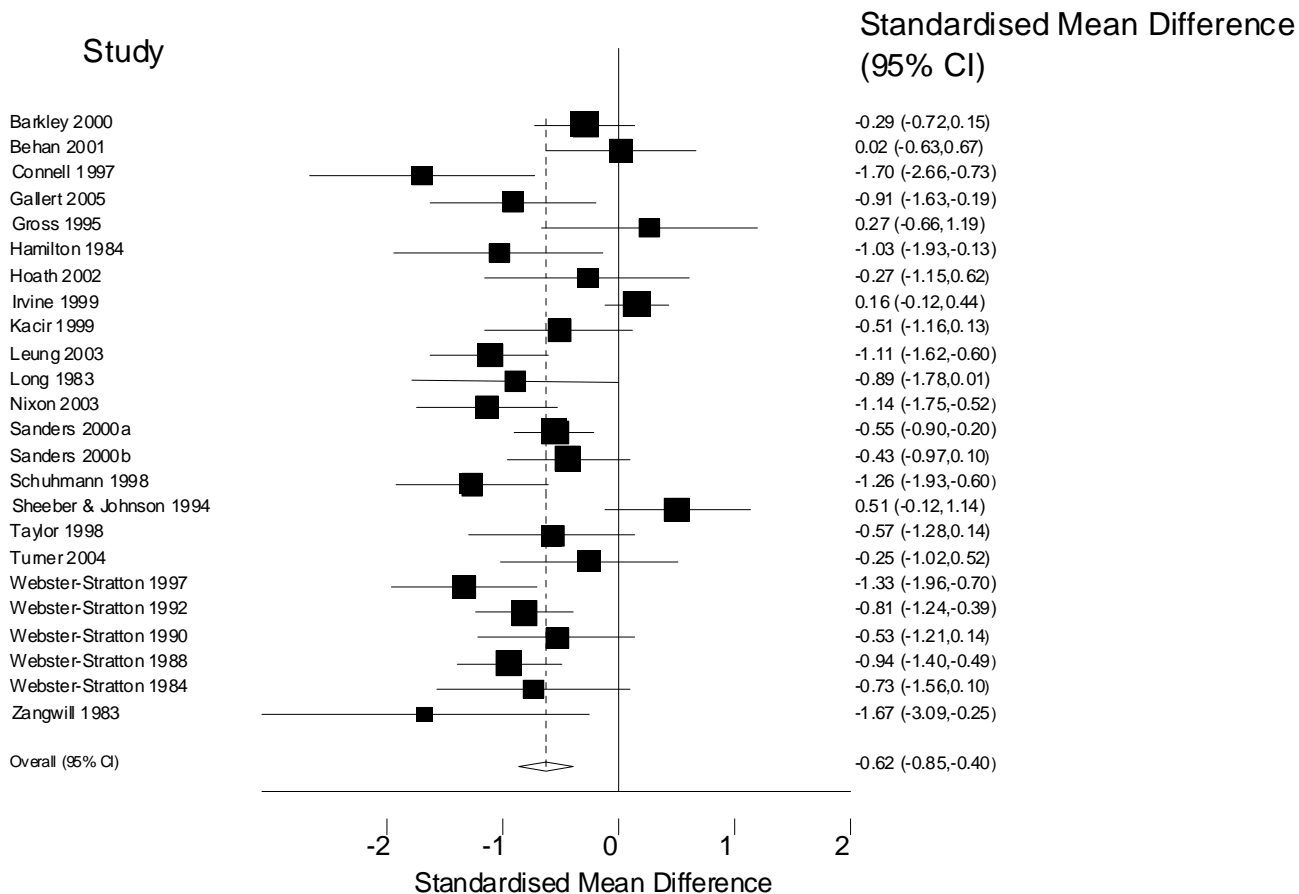

Heterogeneity chi-squared = 77.39 (d.f. = 23) p = 0.000

Estimate of between-study variance Tau-squared = 0.2050

Test of SMD=0 : z= 5.39 p = 0.000
